# Supplementary material for: Unveiling the impact of organically activated biochar on physiological, biochemical, and yield attributes of maize under varied field moisture conditions
Source: PeerJ. 2024 Oct 1;12:e17883. doi: 10.7717/peerj.17883 (PMC11451447; doi:10.7717/peerj.17883)
Supplement: Supplemental Information 1 [file peerj-12-17883-s001.xlsx]

## Sheet: Sheet1
Treatment	Chlorophyll a V14	Chlorophyll a R3	Chlorophyll b V14	Chlorophyll b R3	Total Chlorophyll V14	Total Chlorophyll R3	Carotenoid at V14	Carotenoid at R3	Sugar content V14	Sugar content R3	Proline content V14	Proline content R3	Relative Water Content at V14	Relative Water Content at R3	Ear length	Ear Weight	Total Number of grains	Total grain weight	Root fresh weight	Shoot fresh weight	Leaf fresh weight	Root dry weight	Shoot dry weight	Leaf dry weight	Shoot length	Root length
0 t/ha activated biochar+100% Irrigation water + DK-9108	2.68107	3.104	0.7821	0.947406	3.46317	4.05141	0.616443	0.869209	0.3421	0.4986	1.64605	6.19289	80.8684	61.4378	24.4233	39.7567	441.667	84.5133	168.42	1107.45	162.02	75.15	240.453	59.02	252.712	62.6567
0 t/ha activated biochar+70% Irrigation water + DK-9108	2.48648	3.36599	0.749375	0.846669	3.23585	4.21266	0.581374	0.7778	0.3551	0.5006	2.13938	6.39726	72.1427	52.6455	26.98	45.98	467.333	96.96	174.307	1114.82	156.823	81.0367	247.817	53.8233	258.902	67.3567
0 t/ha activated biochar+50% Irrigation water + DK-9108	2.28554	2.69355	0.400144	0.753619	2.68568	3.44717	0.30805	0.690007	0.3761	0.507833	2.58955	6.68578	48.7389	37.7136	11.2	26.5333	403	58.0667	163.183	1100.27	150.68	69.9133	233.273	47.68	245.603	57.0167
2 t/ha activated biochar+100% Irrigation water + DK-9108	2.78439	4.5847	1.02408	0.962094	3.80847	5.5468	0.77671	0.872187	0.2711	0.4856	0.640881	4.22134	90.0355	64.0278	25.5333	49.8667	549	104.733	191.78	1140.85	199.703	98.51	273.853	96.7033	275.492	79.1283
2 t/ha activated biochar+70% Irrigation water + DK-9108	2.83253	4.7022	0.949762	1.00087	3.78229	5.70308	0.722579	0.890727	0.2991	0.4876	0.591548	4.56395	86.7563	53.6539	27.38	67.38	572	139.76	197.753	1147.05	195.557	104.483	280.05	92.5567	279.775	84.8583
2 t/ha activated biochar+50% Irrigation water + DK-9108	2.95982	4.49122	0.955558	0.949706	3.91538	5.44092	0.718883	0.842983	0.3186	0.489233	1.08488	4.89455	68.7222	40.1366	20.64	34.3067	508	73.6133	186.627	1137.46	187.467	93.3567	270.46	84.4667	271.975	74.3083
4 t/ha activated biochar+100% Irrigation water + DK-9108	2.94079	4.84108	0.984413	0.94655	3.9252	5.78763	0.747771	0.865408	0.2421	0.4746	0.745715	5.09291	113.055	65.718	29.2867	85.3433	564	175.687	231.11	1179.06	228.023	137.84	312.057	125.023	277.312	93.85
4 t/ha activated biochar+70% Irrigation water + DK-9108	2.97149	4.90292	0.938963	1.00228	3.91045	5.9052	0.71466	0.913726	0.2581	0.476333	0.332548	5.43553	88.8727	54.0731	31.01	92.62	629.333	190.24	239.323	1184.96	218.41	146.053	317.963	115.41	281.958	97.79
4 t/ha activated biochar+50% Irrigation water + DK-9108	2.71495	4.84549	0.867988	0.894906	3.58294	5.7404	0.66198	0.818559	0.2986	0.4774	1.31922	5.8082	75.7157	43.3708	23.44	66.44	521	137.88	224.577	1171.75	209.323	131.307	304.747	106.323	271.457	87.94
0 t/ha activated biochar+100% Irrigation water + DK-6321	2.69487	2.25663	0.89435	0.762031	3.58922	3.01866	0.439537	0.689062	0.3636	0.4976	1.70155	5.87432	77.3863	62.7864	25.3167	46.4233	477.667	97.8467	183.953	1130.47	183.8	90.6833	263.467	80.8	260.382	67.16
0 t/ha activated biochar+70% Irrigation water + DK-6321	2.85154	2.12953	0.5107	0.857675	3.36224	2.9872	0.246056	0.775014	0.3756	0.500833	1.94822	6.16885	65.9256	52.8015	28.7067	52.6467	489.667	110.293	189.373	1136.45	176.65	96.1033	269.453	73.65	262.75	71.83
0 t/ha activated biochar+50% Irrigation water + DK-6321	2.61951	2.0411	0.2766	0.790025	2.89611	2.83113	0.135512	0.717345	0.4051	0.503767	2.51555	6.43332	54.2478	40.8396	25.3467	39.9367	469.333	84.8733	176.89	1122.82	168.59	83.62	255.82	65.59	255.417	61.345
2 t/ha activated biochar+100% Irrigation water + DK-6321	2.95642	4.57721	0.972431	0.950481	3.92886	5.52769	0.737901	0.840678	0.3516	0.4896	0.795048	3.72244	85.0087	69.9121	30.9667	73.3	575	151.6	212.467	1155.7	243.137	119.197	288.703	140.137	283.085	84.6367
2 t/ha activated biochar+70% Irrigation water + DK-6321	3.25129	4.64764	0.872956	0.957963	4.12424	5.60561	0.665032	0.84826	0.3616	0.491367	0.616215	4.19729	82.4677	57.4961	28.54	88.54	610	182.08	228.31	1162.06	235.47	135.04	295.06	132.47	280.43	88.87
2 t/ha activated biochar+50% Irrigation water + DK-6321	2.82763	4.52253	0.753962	0.935087	3.58159	5.45762	0.574566	0.8275	0.3811	0.493367	0.751881	4.55193	64.4379	42.4549	25.8567	59.5233	527.333	124.047	203.35	1140.12	225.613	110.08	273.12	122.613	274.195	71.43
4 t/ha activated biochar+100% Irrigation water + DK-6321	3.21821	5.23653	0.913806	0.875475	4.13201	6.11201	0.694424	0.80324	0.3021	0.480933	1.12188	4.77433	105.91	72.5317	31.48	124.503	588.667	254.007	258.51	1195.91	264.893	165.24	328.91	161.893	284.892	96.26
4 t/ha activated biochar+70% Irrigation water + DK-6321	3.27764	5.38246	0.948662	0.889006	4.2263	6.27146	0.721799	0.815368	0.3166	0.478733	1.04788	5.12296	89.2145	57.0709	37.17	139.48	642	283.96	270.937	1203.75	257.113	177.667	336.747	154.113	289.577	106.917
4 t/ha activated biochar+50% Irrigation water + DK-6321	2.913	5.04717	0.872144	0.899856	3.78514	5.94703	0.663596	0.78137	0.333267	0.484344	0.973882	4.81641	86.5208	57.3525	31.5022	107.836	586	220.671	244.266	1179.93	249.207	150.996	312.926	146.207	282.888	90.5356
0 t/ha activated biochar+100% Irrigation water + Sarhaab	2.66103	3.59769	0.871375	0.620544	3.5324	4.21823	0.422566	0.57183	0.3736	0.527567	2.44155	6.24098	74.4778	58.9849	25.4367	29.7567	439.333	64.5133	130.553	1103.33	146.893	37.2833	236.333	43.8933	244.89	55.5117
0 t/ha activated biochar+70% Irrigation water + Sarhaab	2.79952	3.6302	0.523683	0.572375	3.3232	4.20258	0.261285	0.524403	0.3831	0.525833	2.41688	6.59562	64.2406	46.1402	27.85	35.98	444.667	76.96	136.553	1110.92	139.063	43.2833	243.923	36.0633	249.29	60.5833
0 t/ha activated biochar+50% Irrigation water + Sarhaab	2.5604	3.43056	0.232775	0.564937	2.79317	3.9955	0.125188	0.521877	0.4211	0.5285	2.62655	6.90217	53.7958	36.0744	22.29	21.2	410.667	47.4	122.827	1095.43	131.89	29.5567	228.433	28.89	240.545	52.5833
2 t/ha activated biochar+100% Irrigation water + Sarhaab	3.13996	4.34262	1.00123	0.924338	4.14119	5.26696	0.758484	0.852588	0.3646	0.503167	0.980048	5.29127	82.9308	62.8793	27.95	55.5333	499.333	116.067	167.657	1120.26	175.157	74.3867	253.263	72.1567	272.465	75.3067
2 t/ha activated biochar+70% Irrigation water + Sarhaab	3.19833	4.45553	0.911763	0.908306	4.11009	5.36384	0.692171	0.833535	0.3791	0.5038	0.912215	5.6459	81.7974	53.335	29.8	62.0467	563	129.093	173.327	1125.65	170.483	80.0567	258.647	67.4833	275.19	80.375
2 t/ha activated biochar+50% Irrigation water + Sarhaab	2.99739	4.33856	0.804169	0.893425	3.80156	5.23198	0.613158	0.820489	0.4076	0.5048	1.07255	5.96448	69.5971	41.1163	22.08	41.3067	475.333	87.6133	162.413	1117.97	167.517	69.1433	250.973	64.5167	265.66	71.2333
4 t/ha activated biochar+100% Irrigation water + Sarhaab	3.12299	4.52588	0.945131	0.889475	4.06812	5.41535	0.716071	0.820311	0.3211	0.484267	1.15272	6.1448	101.224	62.8484	30.09	75.3433	592	155.687	213.413	1126.31	193.253	120.143	259.31	90.2533	276.625	84.7167
4 t/ha activated biochar+70% Irrigation water + Sarhaab	3.09083	4.60028	0.923706	0.901556	4.01453	5.50184	0.700692	0.815996	0.3371	0.479167	1.23288	6.37923	82.684	51.6354	33.45	86.2867	623	177.573	220.407	1132.91	184.073	127.137	265.91	81.0733	280.583	89.545
4 t/ha activated biochar+50% Irrigation water + Sarhaab	3.006	4.48824	0.891002	0.894819	3.897	5.38306	0.677	0.798	0.355267	0.489411	1.15272	6.16284	84.5016	51.8667	28.54	67.6456	563.444	140.291	198.744	1125.73	181.614	105.474	258.731	78.6144	274.289	79.17
